# Supplementary material
Source: bioRxiv or medRxiv preprint supplement (https://medrxiv.org/highwire/filestream/77732/field_highwire_adjunct_files/0/2020.04.20.20065979-1.pdf)
Supplement: Supplementary file [file 2020.04.20.20065979-1.pdf]

**Supplementary Web Appendix Regarding The Manuscript:**

**Liver transplantation without graft ischemia in humans**

**by**

**Zhiyong Guo, Qiang Zhao, Shanzhou Huang, Changjun Huang, et al**

---

| <b>Table of contents</b>                                                                                                                                                                                     | <b>PAGE</b> |
|--------------------------------------------------------------------------------------------------------------------------------------------------------------------------------------------------------------|-------------|
| <b>TABLES</b>                                                                                                                                                                                                | 3-11        |
| <b>Table S1.</b> The characteristics of the extended criteria donors.                                                                                                                                        | 3           |
| <b>Table S2.</b> Organ utilization in the two groups.                                                                                                                                                        | 4           |
| <b>Table S3.</b> The characteristics and transplant outcomes of kidney transplant recipients.                                                                                                                | 5-6         |
| <b>Table S4.</b> The donor and recipient operation characteristics.                                                                                                                                          | 7           |
| <b>Table S5.</b> The liver functions tests of the patients with early allograft dysfunction (EAD).                                                                                                           | 8-9         |
| <b>Table S6.</b> Causes of patient death.                                                                                                                                                                    | 10          |
| <b>Table S7.</b> The liver function recovery in the extended versus standard criteria donor subgroups.                                                                                                       | 11          |
| <b>FIGURES</b>                                                                                                                                                                                               | 12-17       |
| <b>Figure S1.</b> The results of renal function tests and patient/graft survival post renal transplantation in the ischemia-free liver transplantation (IFLT) and conventional liver transplantation donors. | 12          |
| <b>Figure S2.</b> The body temperature of the recipients in the ischemia-free liver transplantation (IFLT) and conventional liver transplantation (CLT) group.                                               | 13          |
| <b>Figure S3.</b> The results of coagulation function tests post-transplantation.                                                                                                                            | 14          |
| <b>Figure S4.</b> Parameters of machine perfusion during ischemia-free liver transplantation (IFLT).                                                                                                         | 15          |
| <b>Figure S5.</b> The results of liver function tests post-transplantation between the two groups.                                                                                                           | 16          |
| <b>Figure S6.</b> Ischemia-free liver transplantation (IFLT) facilitates successful transplantation of extended criteria donor (ECD) livers.                                                                 | 17          |
| <b>Figure S7.</b> Patient (A) and graft survival (B) in patients with versus without early allograft dysfunction (EAD) in the conventional liver transplantation (CLT) group.                                | 18          |

---

**Supplemental Table 1. The characteristics of the extended criteria donors.**

| Donors  | Criteria                        | Donors  | Criteria                                                |
|---------|---------------------------------|---------|---------------------------------------------------------|
| IFLT-01 | 85-95% macrovesicular steatosis | CLT-34  | 30-40% macrovesicular steatosis                         |
| IFLT-08 | Tbil 4.89mg/dL                  | CLT-38  | 35% macrovesicular steatosis                            |
| IFLT-13 | Tbil 3.40mg/dL                  | CLT-50  | Tbil 3.58mg/dL                                          |
| IFLT-15 | Age 66 years                    | CLT-51  | Na <sup>+</sup> 168mmol/L                               |
| IFLT-17 | Na <sup>+</sup> 166mmol/L       | CLT-55  | Age 62 years; Na <sup>+</sup> 177mmol/L; Tbil 3.66mg/dL |
| IFLT-23 | 30-40% macrovesicular steatosis | CLT-57  | Na <sup>+</sup> 166mmol/L                               |
| IFLT-25 | Tbil 4.01mg/dL                  | CLT-60  | Na <sup>+</sup> 168mmol/L                               |
| IFLT-27 | Age 64 years                    | CLT-61  | Na <sup>+</sup> 185mmol/L                               |
| IFLT-33 | Tbil 3.91mg/dL                  | CLT-73  | Na <sup>+</sup> 169mmol/L                               |
| IFLT-34 | Na <sup>+</sup> 169mmol/L       | CLT-84  | Na <sup>+</sup> 166mmol/L                               |
| IFLT-37 | Tbil 3.98mg/dL                  | CLT-86  | Tbil 8.42mg/dL; Na <sup>+</sup> 168mmol/L               |
| IFLT-38 | Tbil 3.56mg/dL                  | CLT-91  | Na <sup>+</sup> 174mmol/L                               |
| CLT-01  | Na <sup>+</sup> 177mmol/L       | CLT-92  | Na <sup>+</sup> 166mmol/L                               |
| CLT-02  | Tbil 4.69mg/dL                  | CLT-94  | Tbil 6.88mg/dL                                          |
| CLT-05  | Tbil 3.96mg/dL; CIT 736 min     | CLT-96  | 30-40% macrovesicular steatosis; CIT 756 min            |
| CLT-11  | Na <sup>+</sup> 184mmol/L       | CLT-104 | Tbil 3.15mg/dL                                          |
| CLT-13  | Na <sup>+</sup> 174mmol/L       | CLT-112 | Tbil 3.39mg/dL                                          |
| CLT-18  | 30-40% macrovesicular steatosis | CLT-118 | CIT 764 min                                             |
| CLT-20  | Na <sup>+</sup> 173mmol/L       | CLT-127 | Tbil 4.33mg/dL                                          |
| CLT-29  | Tbil 6.82mg/dL                  | CLT-128 | 60% macrovesicular steatosis                            |
| CLT-33  | Na <sup>+</sup> 168mmol/L       |         |                                                         |

CIT, cold ischemia time; CLT, conventional liver transplantation; extended criteria donors (ECD); IFLT, ischemia-free liver transplantation; Tbil, total bilirubin.

**Supplemental Table 2. Organ utilization in the two groups.\***

| Donor organ disposition | IFLT group (n=38)                           |                         |              | CLT group (n=130)                           |                         |              | P values†    |
|-------------------------|---------------------------------------------|-------------------------|--------------|---------------------------------------------|-------------------------|--------------|--------------|
|                         | Authorization not obtained or not requested | Retrieved but discarded | Transplanted | Authorization not obtained or not requested | Retrieved but discarded | Transplanted |              |
| Left kidney             | 1 (2.6%)                                    | 3 (7.9%)                | 34 (89.5%)   | 3 (2.3%)                                    | 12 (9.2%)               | 115 (88.5%)  | 1.00         |
| Right kidney            | 1 (2.6%)                                    | 4 (10.5)                | 33 (86.8%)   | 3 (2.3%)                                    | 15 (11.5%)              | 112 (86.2%)  | 1.00         |
| Kidney (overall)        | 2 (2.6%)                                    | 7 (9.2%)                | 67 (88.2%)   | 6 (2.4%)                                    | 27 (10.1%)              | 227 (88.5%)  | 1.00         |
| Heart                   | 26 (68.4%)                                  | 2 (5.3%)                | 10 (26.3%)   | 116 (89.2%)                                 | 0                       | 14 (10.8%)   | <b>0.002</b> |
| Lung                    | 33 (86.8%)                                  | 0                       | 5 (13.2%)    | 124 (95.4%)                                 | 0                       | 6 (4.6%)     | 0.13         |
| Pancreas                | 38 (100%)                                   | 0                       | 0            | 126 (96.9%)                                 | 1 (0.8%)                | 3 (2.3%)     | 1.00         |

\* Data are presented as n (%). IFLT, ischemia-free liver transplantation; CLT, conventional liver transplantation.

† P values apply to comparisons of the entire IFLT group with the CLT group and were calculated with Fisher's exact test for discrete variables.

**Supplemental Table 3. The characteristics and transplant outcomes of kidney transplant recipients.\***

|                            | CLT, N=217  | IFLT, N=67  | P values†        |
|----------------------------|-------------|-------------|------------------|
| Age (years)                | 46.4 ± 12.2 | 48.9 ± 13.6 | 0.16             |
| Sex                        |             |             |                  |
| Male                       | 162 (74.7%) | 48 (71.6%)  | 0.64             |
| Female                     | 55 (25.3%)  | 19 (28.4%)  |                  |
| Body mass index            | 22.5 ± 3.5  | 22.4 ± 3.6  | 0.84             |
| Blood type                 |             |             | <b>&lt;0.001</b> |
| A                          | 76 (35.0%)  | 7 (10.4%)   |                  |
| B                          | 38 (17.5%)  | 19 (28.4%)  |                  |
| AB                         | 15 (6.9%)   | 1 (1.5%)    |                  |
| O                          | 88 (40.6%)  | 40 (59.7%)  |                  |
| Underlying disease         |             |             | 0.96             |
| Chronic glomerulonephritis | 179 (82.5%) | 56 (83.6%)  |                  |
| IgA nephropathy            | 17 (7.8%)   | 5 (7.5%)    |                  |
| Diabetic nephropathy       | 10 (4.6%)   | 2 (3.0%)    |                  |
| Polycystic kidney disease  | 4 (1.8%)    | 1 (1.5%)    |                  |
| Other‡                     | 7 (3.2%)    | 3 (4.5%)    |                  |
| Cold ischemia time (min)   | 527 ± 224   | 479 ± 233   | 0.13             |
| Primary nonfunction        | 1 (0.5%)    | 0           | 1.00             |
| Delayed graft function     | 23 (10.6%)  | 6 (9.0%)    | 0.82             |
| Hospital stay (days)       | 19.6 ± 11.9 | 20.2 ± 11.7 | 0.74             |

\* Data are presented as n (%) or the mean ± standard deviation. Of the 130 CLT and 38 IFLT donors, 217 kidneys and 67 kidneys were transplanted, respectively. CLT, conventional liver transplantation; IFLT, ischemia-free liver transplantation.

† P values apply to comparisons of the entire IFLT group with the CLT group and were calculated with Fisher's exact test for discrete variables and with a 2-tailed Student's T-test for continuous variables.

‡Other underlying disease: Henoch-Schonlein purpura nephritis, membranous nephropathy, systemic lupus erythematosus with nephritis, hypertensive nephropathy or nephritis of an unknown origin.

Definition of DGF: Need for at least one postoperative dialysis session during the first 7 days after transplantation or postoperative day 10 creatinine concentration has not fallen below 221  $\mu\text{mol/L}$ .<sup>1</sup>

Definition of PNF: Permanent loss of allograft function starting immediately after transplantation.<sup>2</sup>

1. Perico N, Cattaneo D, Sayegh MH, Remuzzi G. Delayed graft function in kidney transplantation. *Lancet* 2004;364:1814-27.
2. El-Zoghby ZM, Stegall MD, Lager DJ, et al. Identifying specific causes of kidney allograft loss. *Am J Transplant* 2009;9:527-35.

**Supplemental Table 4. The donor and recipient operation characteristics. \***

| Characteristics                 | IFLT (N=38)      | CLT (N=130)       | P Value†         |
|---------------------------------|------------------|-------------------|------------------|
| Liver retrieval time (min)      | 207 (159-383)    | 45 (26-128)       | <b>&lt;0.001</b> |
| Anhepatic phase (min)           | 48.5 (30-100)    | 50.5 (23-125)     | 0.97             |
| Recipient operation time (min)  | 385 (238-515)    | 445 (285-945)     | <b>&lt;0.001</b> |
| Blood loss (ml)                 | 1925 (100-5,000) | 2000 (300-15,000) | 0.49             |
| Intraoperative use of RBCs (ml) | 800 (0-3,228)    | 1125 (0-15,600)   | 0.16             |
| Intraoperative use of FFP (ml)  | 1600 (300-3,300) | 1550 (0-9,550)    | 0.94             |

\* Data are presented as the median (range). IFLT, ischemia-free liver transplantation; CLT, conventional liver transplantation; RBC, red blood cell; FFP, fresh frozen plasma.

† P values apply to comparisons of the entire IFLT group with the CLT group and were calculated with the 2-tailed Mann-Whitney test for continuous variables.

**Supplemental Table 5. Liver functions tests of patients with early allograft dysfunction (EAD).**

| Recipients | Peak ALT (U/L) within 7 days | Peak AST (U/L) within 7 days | INR on Day 7 | Tbil on Day 7 (mg/dL) |
|------------|------------------------------|------------------------------|--------------|-----------------------|
| IFLT-7     | 4,112                        | 3,474                        | 0.75         | 11.87                 |
| CLT-4      | 8,515                        | 2,629                        | 1.07         | 9.08                  |
| CLT-7      | 4,013                        | 976                          | 1.13         | 9.51                  |
| CLT-8      | 1,255                        | 537                          | 1.10         | 10.11                 |
| CLT-11     | 4,458                        | 1,596                        | 1.16         | 10.75                 |
| CLT-12     | 6,740                        | 2,232                        | 1.08         | 22.98                 |
| CLT-19     | 2,778                        | 1,819                        | 1.31         | 2.97                  |
| CLT-20     | 2,541                        | 633                          | NA           | NA                    |
| CLT-21     | 1,130                        | 408                          | 1.07         | 17.62                 |
| CLT-25     | 2,496                        | 781                          | 1.20         | 13.75                 |
| CLT-28     | 5,108                        | 3,872                        | 1.35         | 5.67                  |
| CLT-30     | 3,428                        | 733                          | 1.11         | 7.46                  |
| CLT-32     | 2,407                        | 983                          | 1.07         | 2.22                  |
| CLT-36     | 952                          | 644                          | 0.97         | 14.88                 |
| CLT-38     | 13,114                       | 4,965                        | 1.32         | 21.13                 |
| CLT-39     | 1,677                        | 86                           | 1.64         | 24.17                 |
| CLT-40     | 480                          | 211                          | 1.06         | 18.71                 |
| CLT-41     | 2,861                        | 1,176                        | 1.16         | 10.61                 |
| CLT-42     | 4,635                        | 1,177                        | 1.08         | 13.34                 |
| CLT-44     | 9,951                        | 5,380                        | 1.07         | 10.65                 |
| CLT-58     | 2,817                        | 2,027                        | 1.22         | 21.60                 |
| CLT-60     | 4,186                        | 2,422                        | 1.16         | 32.70                 |
| CLT-61     | 7,395                        | 3,735                        | NA           | NA                    |
| CLT-63     | 1,600                        | 437                          | 1.32         | 22.58                 |
| CLT-64     | 2,227                        | 445                          | 1.15         | 2.65                  |
| CLT-65     | 4,849                        | 2,636                        | 1.10         | 5.43                  |
| CLT-66     | 2,671                        | 843                          | 1.10         | 5.34                  |
| CLT-69     | 3,339                        | 1,803                        | 1.07         | 9.90                  |
| CLT-70     | 6,076                        | 3,792                        | 1.02         | 23.41                 |
| CLT-73     | 2,270                        | 994                          | 1.24         | 6.53                  |
| CLT-75     | 3,974                        | 1,748                        | 1.16         | 3.45                  |



|         |        |        |      |       |
|---------|--------|--------|------|-------|
| CLT-79  | 2,026  | 1,428  | 1.18 | 10.20 |
| CLT-82  | 5,097  | 2,243  | NA   | 8.67  |
| CLT-83  | 1,285  | 715    | 1.07 | 23.00 |
| CLT-86  | 3,244  | 1,387  | NA   | 6.86  |
| CLT-87  | 884    | 718    | 2.28 | 8.44  |
| CLT-89  | 25,083 | 10,500 | 1.20 | 21.46 |
| CLT-90  | 711    | 351    | 1.11 | 13.88 |
| CLT-91  | 12,464 | 3,105  | 0.90 | 24.12 |
| CLT-93  | 3,660  | 876    | 1.32 | 1.80  |
| CLT-94  | 7,236  | 1,357  | 0.99 | 4.99  |
| CLT-101 | 3,986  | 1,415  | 1.14 | 15.80 |
| CLT-102 | 2,504  | 1,060  | 0.91 | 3.81  |
| CLT-103 | 443    | 152    | 0.93 | 19.09 |
| CLT-104 | 3,596  | 693    | 1.33 | 20.49 |
| CLT-108 | 4,086  | 777    | 0.98 | 1.73  |
| CLT-110 | 809    | 272    | 1.51 | 13.98 |
| CLT-112 | 1,171  | 512    | 1.89 | 3.16  |
| CLT-113 | 2,035  | 1,186  | 1.16 | 19.31 |
| CLT-114 | 10,728 | 3,803  | 1.04 | 22.50 |
| CLT-115 | 9,289  | 2,834  | 1.10 | NA    |
| CLT-116 | 1,358  | 1,042  | 1.00 | 14.19 |
| CLT-117 | 2,499  | 1,074  | 1.10 | 2.42  |
| CLT-119 | 1,633  | 385    | 1.06 | NA    |
| CLT-122 | 4,121  | 2,811  | 1.26 | 10.20 |
| CLT-123 | 2,110  | 1,468  | 1.11 | 2.30  |
| CLT-125 | 10,686 | 6,797  | 1.10 | 16.77 |
| CLT-130 | 750    | 506    | 2.28 | 7.98  |

ALT, alanine aminotransferase; AST, aspartate aminotransferase; CLT, conventional liver transplantation; EAD, early allograft dysfunction; IFLT, ischemia-free liver transplantation; INR, international normalized ratio; NA, not applicable; Tbil, total bilirubin.

**Supplemental Table 6. Causes of patient death.**

| Recipients | Cause of death                                                                 | Survival days |
|------------|--------------------------------------------------------------------------------|---------------|
| IFLT-28    | Lung infection; Septic shock                                                   | 22            |
| CLT-03     | Rejection                                                                      | 317           |
| CLT-05     | HAT; Portal vein thrombosis; Lung infection                                    | 14            |
| CLT-18     | HAT; Lung infection; Septic shock                                              | 9             |
| CLT-20     | PNF                                                                            | 1             |
| CLT-34     | Lung infection; Septic shock                                                   | 210           |
| CLT-38     | Lung infection; Acute kidney injury; Suspicious portal vein thrombosis         | 40            |
| CLT-39     | Intra-abdominal infection; Hepatic necrosis; Septic shock                      | 33            |
| CLT-60     | Heart failure; Acute kidney injury                                             | 27            |
| CLT-61     | PNF; Lung infection; Septic shock; Acute kidney injury                         | 9             |
| CLT-69     | Lung infection; Septic shock                                                   | 19            |
| CLT-83     | Intra-abdominal infection; Lung infection; Liver failure                       | 23            |
| CLT-85     | HAT; Biliary leakage; Intra-abdominal infection                                | 149           |
| CLT-89     | HAT; Intra-abdominal infection                                                 | 22            |
| CLT-91     | Liver failure; Acute kidney injury                                             | 27            |
| CLT-101    | Tumor recurrence                                                               | 351           |
| CLT-103    | Esophageal-mediastinal fistula; Mediastinal infection; Pyothorax; Septic shock | 80            |
| CLT-115    | PNF; Lung infection; Septic shock                                              | 4             |
| CLT-116    | HAT; Intra-abdominal hemorrhage                                                | 16            |
| CLT-118    | HAT; Intra-abdominal infection                                                 | 118           |
| CLT-119    | PNF                                                                            | 1             |

CIT, cold ischemia time; CLT, conventional liver transplantation; HAT; hepatic artery thrombosis; IFLT, ischemia-free liver transplantation.

**Supplemental Table 7. Liver function recovery in the extended versus standard criteria donor subgroups.**

| Outcomes              | IFLT_ECD (A)      | IFLT_SCD (B)      | CLT_ECD (C)       | CLT_SCD (D)       | P Value† |                  |                  |             |
|-----------------------|-------------------|-------------------|-------------------|-------------------|----------|------------------|------------------|-------------|
|                       |                   |                   |                   |                   | A vs. B  | A vs. C          | A vs. D          | C vs. D     |
| EAD                   | 0/12              | 1/26              | 16/29             | 41/101            | 1.00     | <b>0.001</b>     | <b>0.004</b>     | 0.23        |
| Peak AST (U/L)        | 365 (149-4112)    | 329 (228-984)     | 1959 (302-13114)  | 1325 (149-20583)  | 0.43     | <b>&lt;0.001</b> | <b>&lt;0.001</b> | <b>0.04</b> |
| Peak ALT (U/L)        | 259 (66-404)      | 150 (48-3474)     | 750 (123-6426)    | 658 (86-10500)    | 0.53     | <b>&lt;0.001</b> | <b>&lt;0.001</b> | 0.19        |
| Peak Tbil (mg/dL)     | 4.75 (2.68-12.47) | 3.67 (1.04-12.82) | 9.33 (2.53-51.97) | 9.15 (1.50-36.46) | 0.55     | <b>0.03</b>      | <b>0.04</b>      | 0.40        |
| Tbil on POD 7 (mg/dL) | 1.65 (0.77-12.47) | 2.68 (0.68-11.87) | 7.30 (1.16-51.97) | 3.61 (0.56-37.08) | 0.47     | <b>0.004</b>     | <b>0.04</b>      | 0.16        |
| INR on POD 7          | 1.09 (0.96-1.33)  | 1.13 (0.95-1.51)  | 1.14 (0.90-1.89)  | 1.09 (0.91-2.28)  | 0.07     | 0.12             | 0.52             | 0.10        |

\* Data are expressed as n or the median (range). AST, aspartate aminotransferase; ALT, alanine aminotransferase; CLT, conventional liver transplantation; EAD, early allograft dysfunction; ECD, extended criteria donor; IFLT, ischemia-free liver transplantation; INR, international normalized ratio; POD, postoperative day; Tbil, total bilirubin.

† P values were calculated with Fisher's exact test for discrete variables and a 2-tailed Mann-Whitney test for continuous variables.

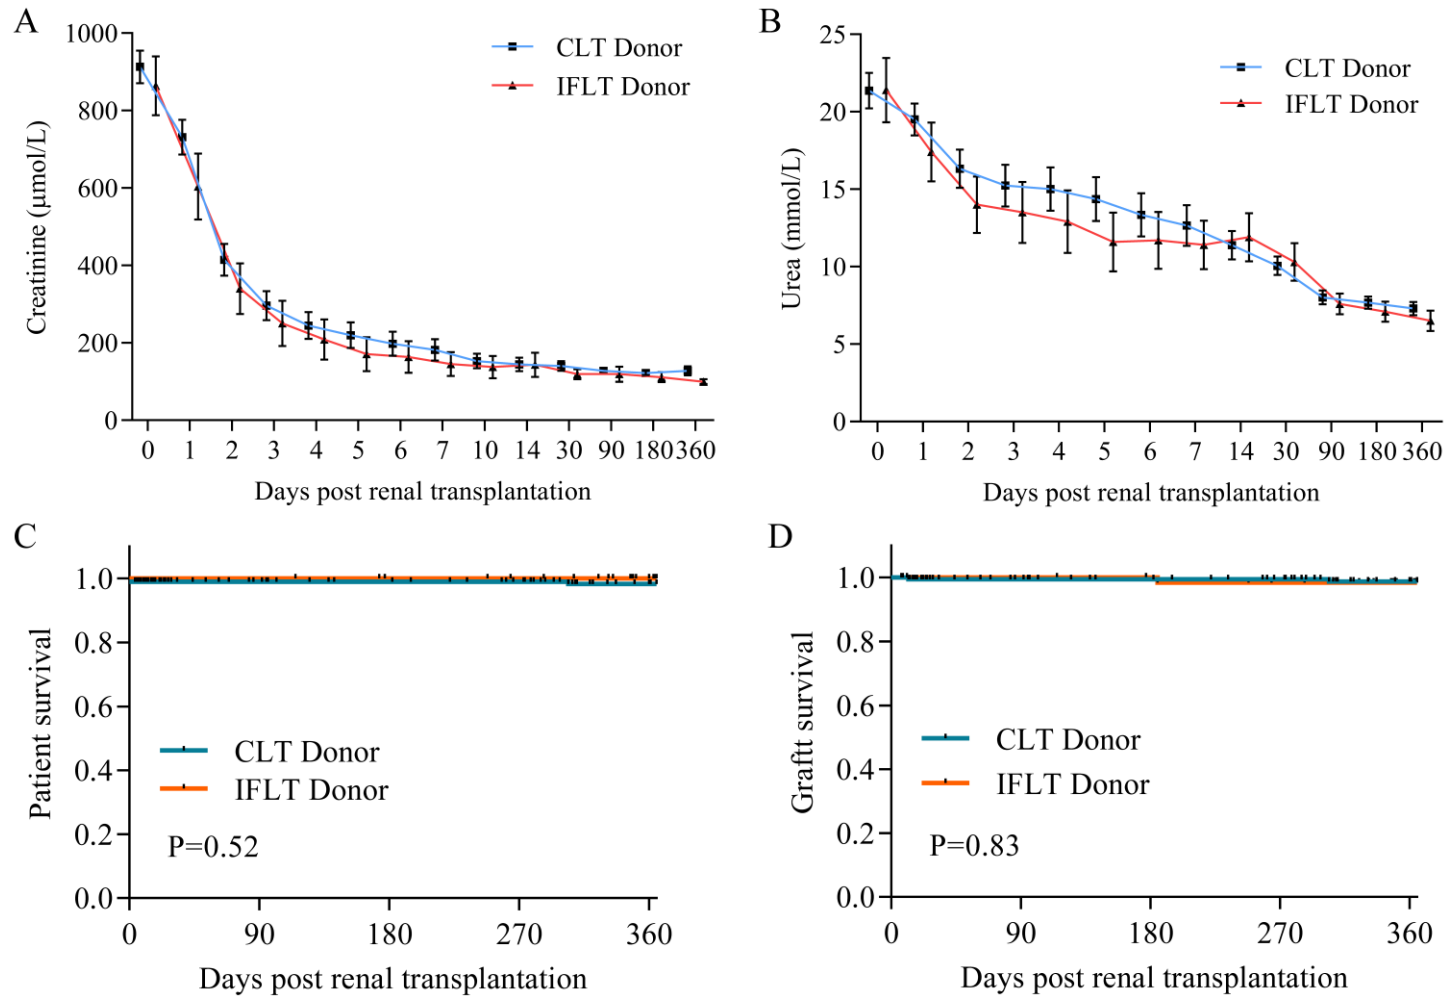

**Figure S1. The results of renal function tests and patient/graft survival post renal transplantation in ischemia-free liver transplantation (IFLT) and conventional liver transplantation (CLT) donors.** Data on the Figure A and Figure B are presented as mean  $\pm$  standard deviation. The levels of creatinine (A) and urea (B) postrenal transplantation in the IFLT and CLT donor groups. P values were calculated with the 2-tailed Student's T-test. There was no statistic difference between the two groups. Kaplan-Meier methods were used to analyze patient (C) and graft (D) survival postrenal transplantation in the IFLT and CLT donor groups. P values were calculated with the log-rank test.

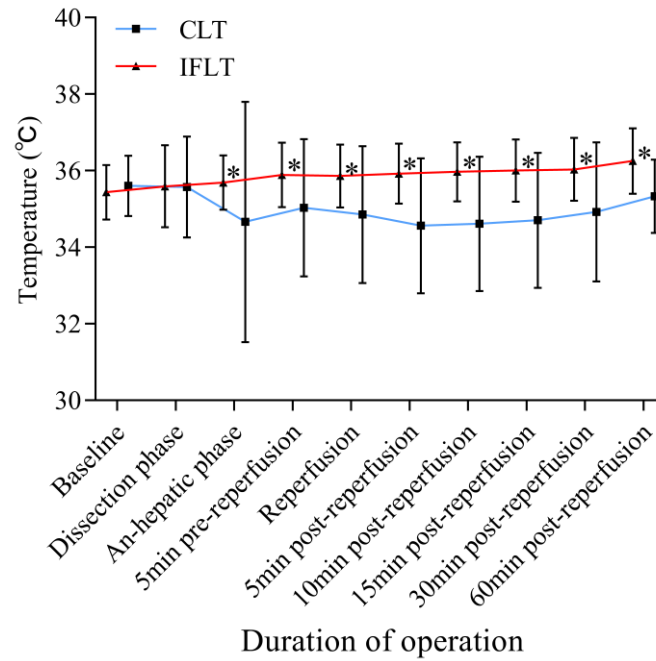

**Figure S2. The body temperature of the recipients in the ischemia-free liver transplantation (IFLT) and conventional liver transplantation (CLT) groups.** Data on the Figure is presented as mean  $\pm$  standard deviation. P value was calculated with the 2-tailed Student's T-test. \* Denotes a P value < 0.05.

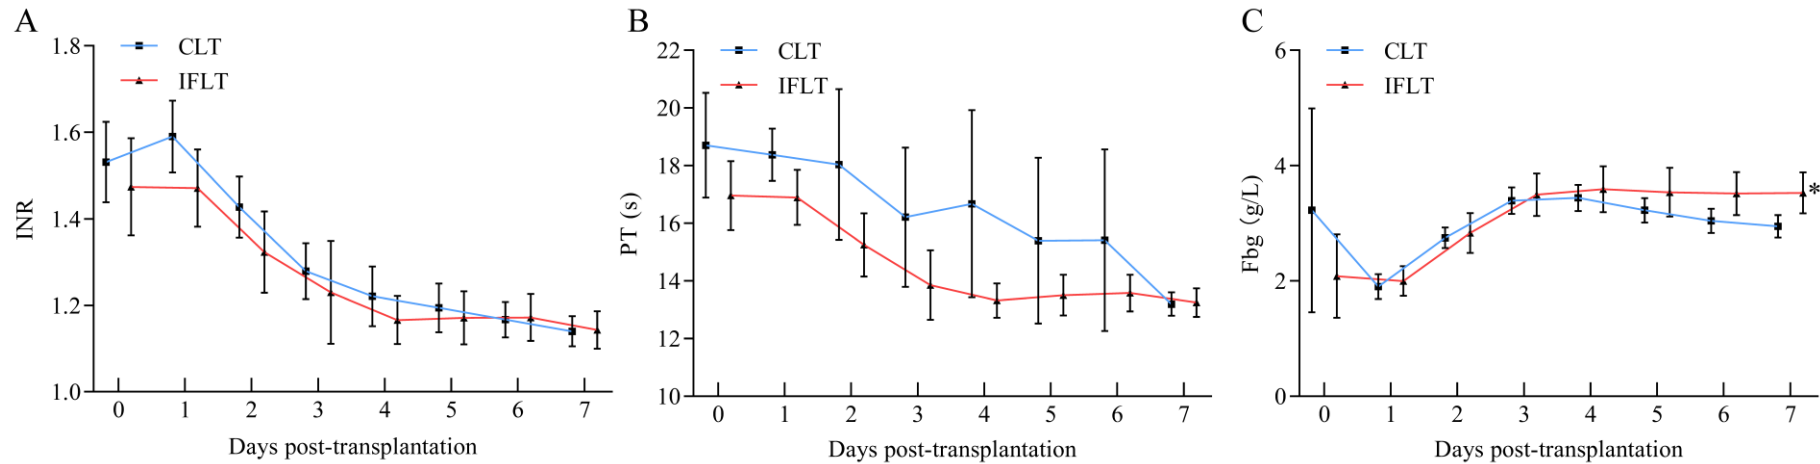

**Figure S3. The results of coagulation function tests posttransplantation.** Data on the Figures are presented as mean  $\pm$  standard deviation. The levels of international normalized ratio (INR) **(A)**, prothrombin time (PT) **(B)** and fibrinogen (Fbg) **(C)** during the early phase posttransplantation. P values were calculated with the 2-tailed Mann-Whitney test. \* Denote a P value < 0.05. CLT, conventional liver transplantation; IFLT, ischemia-free liver transplantation.

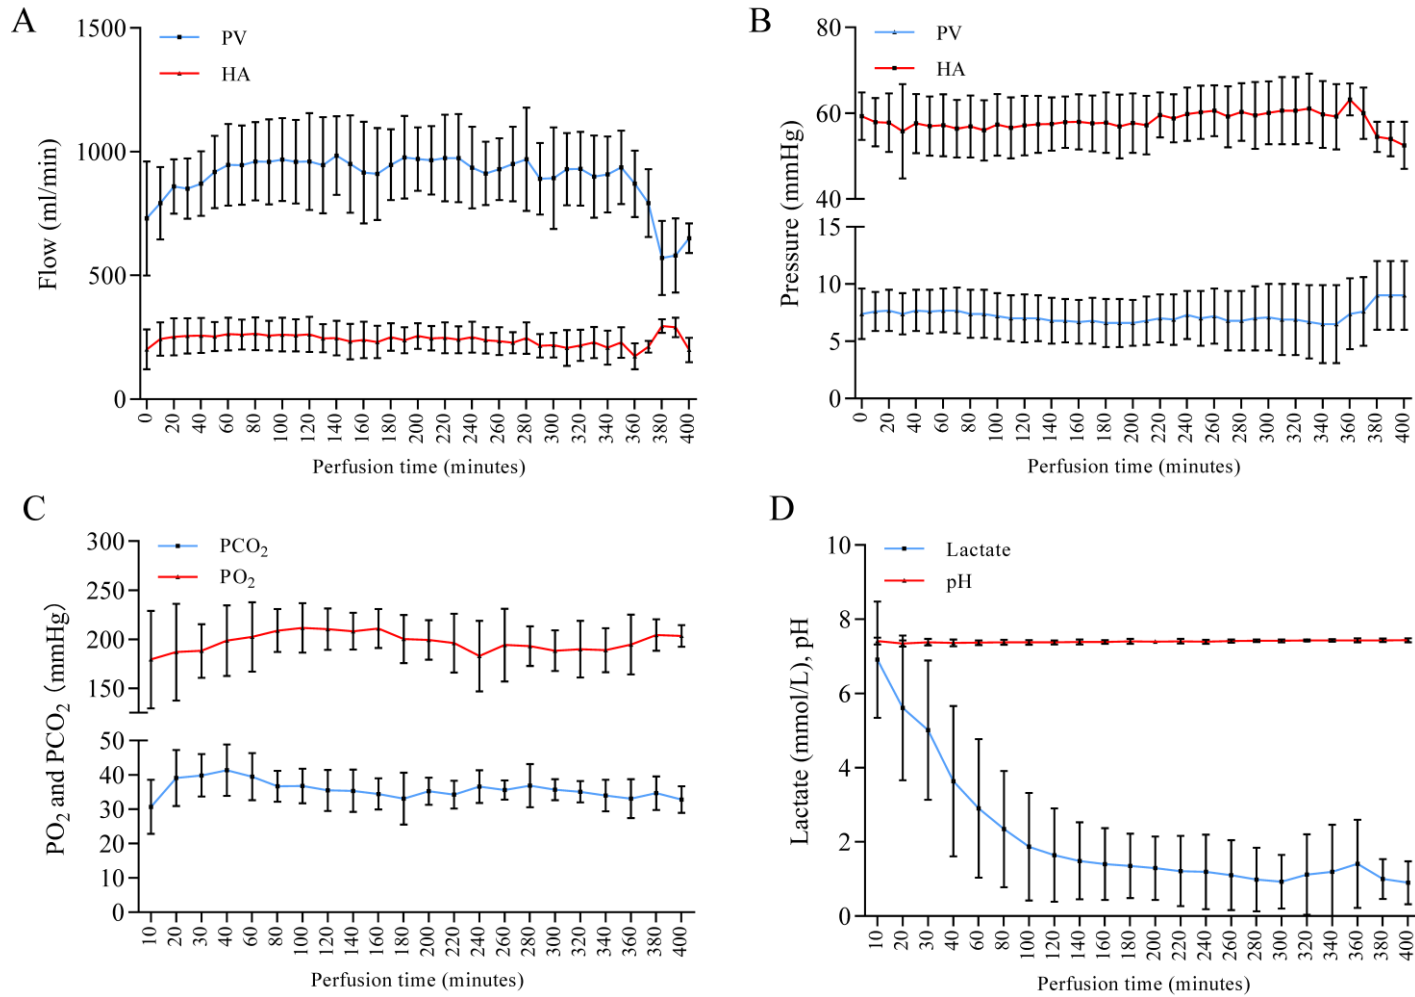

**Figure S4. Parameters of machine perfusion during ischemia-free liver transplantation (IFLT).** Data on the Figures are presented as mean  $\pm$  standard deviation. The pressure (A) and flow (B) of both the portal vein (PV) and hepatic artery (HA) throughout IFLT. The partial pressure of carbon dioxide (pO<sub>2</sub>), partial pressure of carbon dioxide (pCO<sub>2</sub>) (C), Pondus Hydrogenii (pH) value and lactate (D) levels in the perfusate during IFLT.

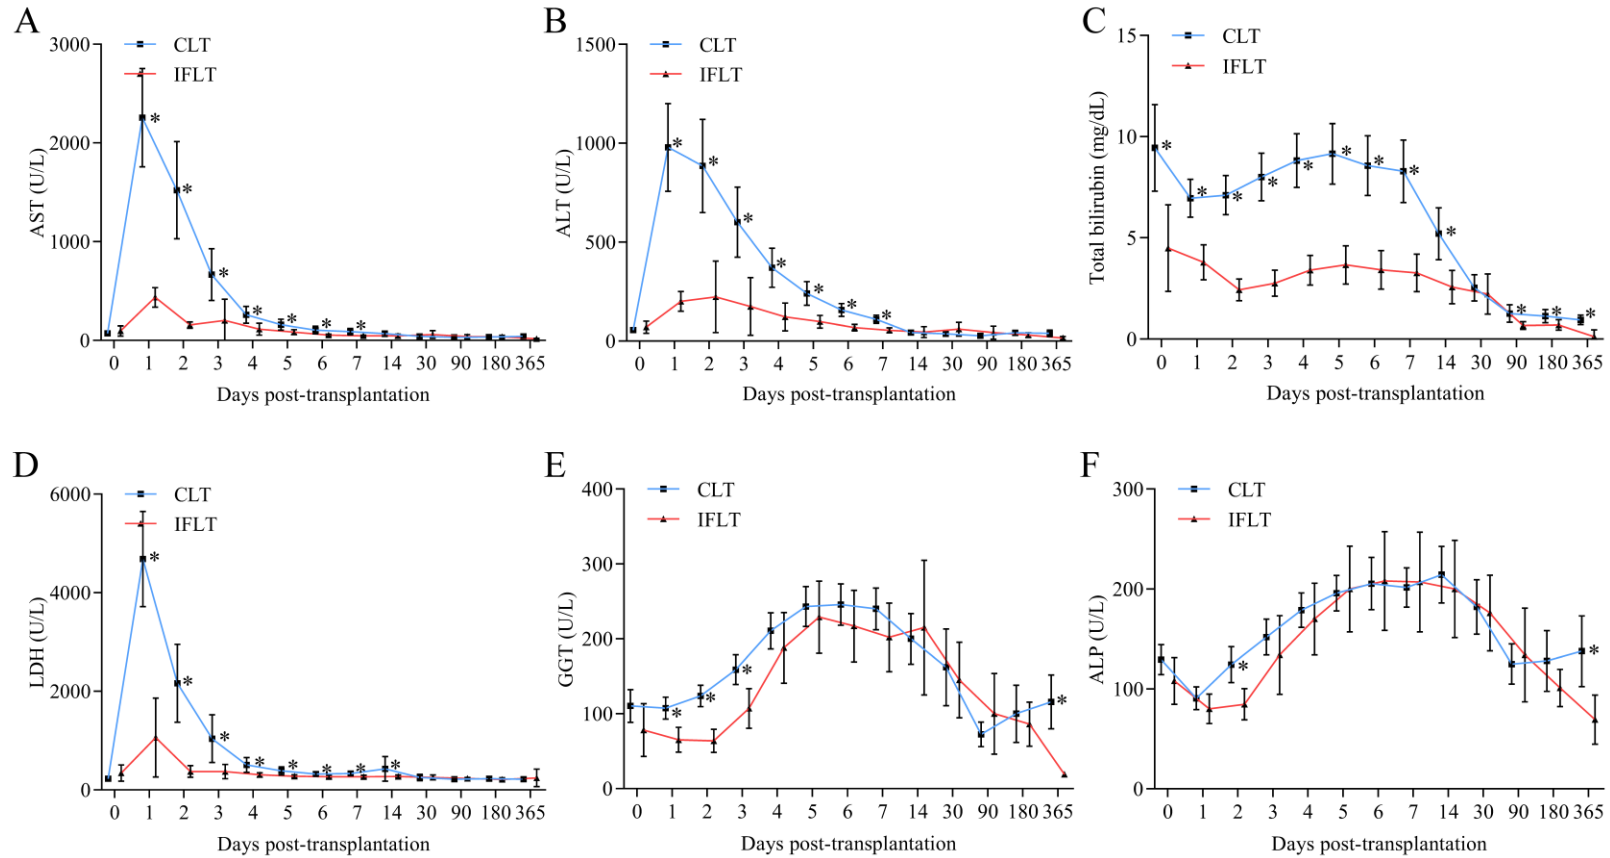

**Figure S5. The results of liver function tests posttransplantation between the two groups.**

Data on the Figures are presented as mean  $\pm$  standard deviation. The cumulative release of aspartate aminotransferase (AST) (A), alanine aminotransferase (ALT) (B), total bilirubin (Tbil) (C), lactate dehydrogenase (LDH) (D), gamma-glutamyl transpeptidase (GGT) (E) and alkaline phosphatase (ALP) (F) within one year posttransplantation between ischemia-free liver transplantation (IFLT) and conventional liver transplantation (CLT). P values were calculated with the 2-tailed Mann-Whitney test. \* Denotes a P value < 0.05.



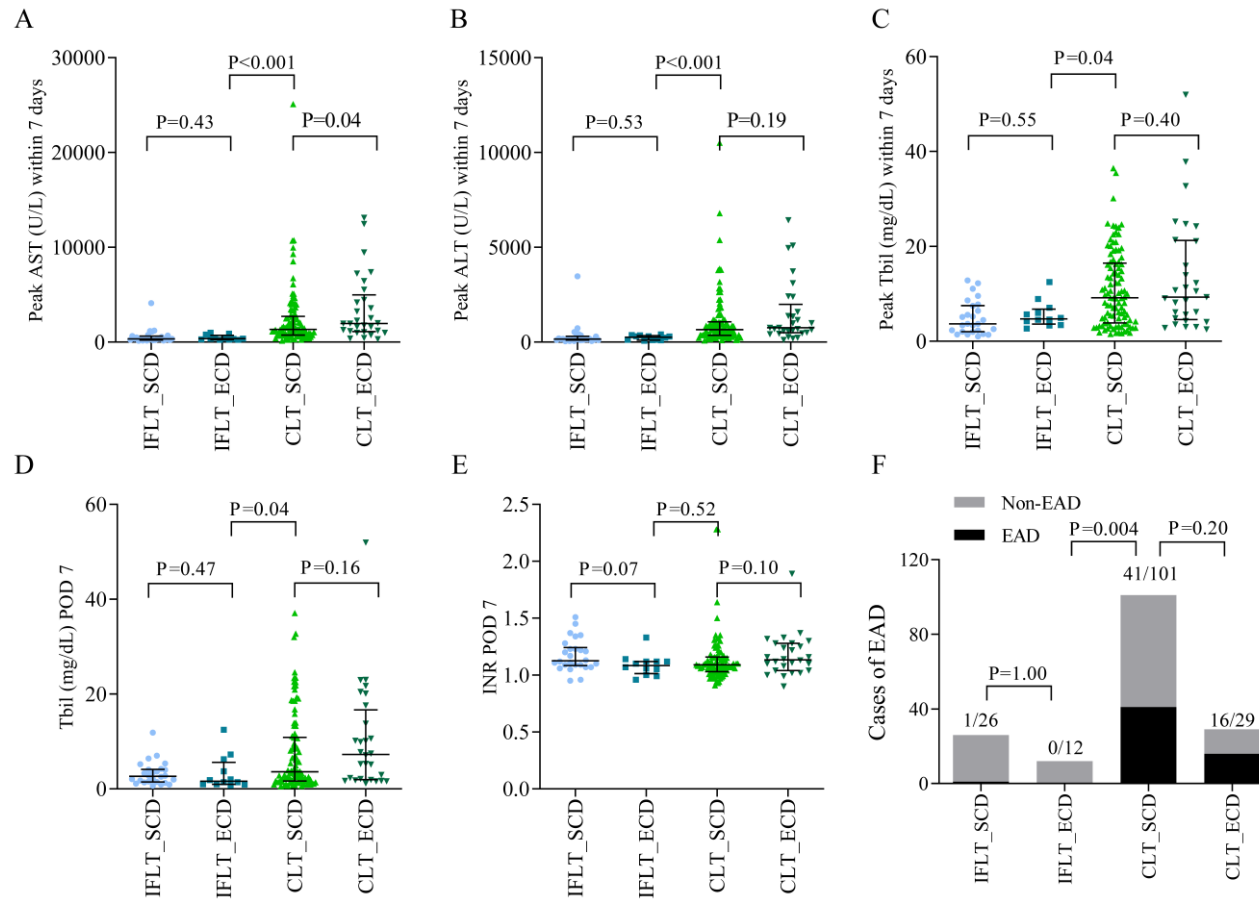

**Figure S6. Ischemia-free liver transplantation (IFLT) facilitates successful transplantation of extended criteria donor (ECD) livers.** Data on the Figures A to E are presented as mean  $\pm$  standard deviation. There were 26, 12, 101 and 29 patients in the IFLT\_SCD, IFLT\_ECD, CLT\_SCD and CLT\_ECD subgroups, respectively. The results of posttransplant liver function tests, including aspartate aminotransferase (AST) (A), alanine aminotransferase (ALT) (B), total bilirubin (Tbil) (C & D) and international normalized ratio (INR) (E) in the four subgroups. P values were calculated with the 2-tailed Mann-Whitney test. Data on the Figure F are presented as n. There were 1, 0, 41 and 16 early allograft dysfunction (EAD) patients in the IFLT\_SCD, IFLT\_ECD, CLT\_SCD and CLT\_ECD subgroups, respectively. The incidence of EAD in the four subgroups (F). P values were calculated with the Fisher's exact test. CLT, conventional liver transplantation; POD, post operation day; SCD, standard criteria donor.

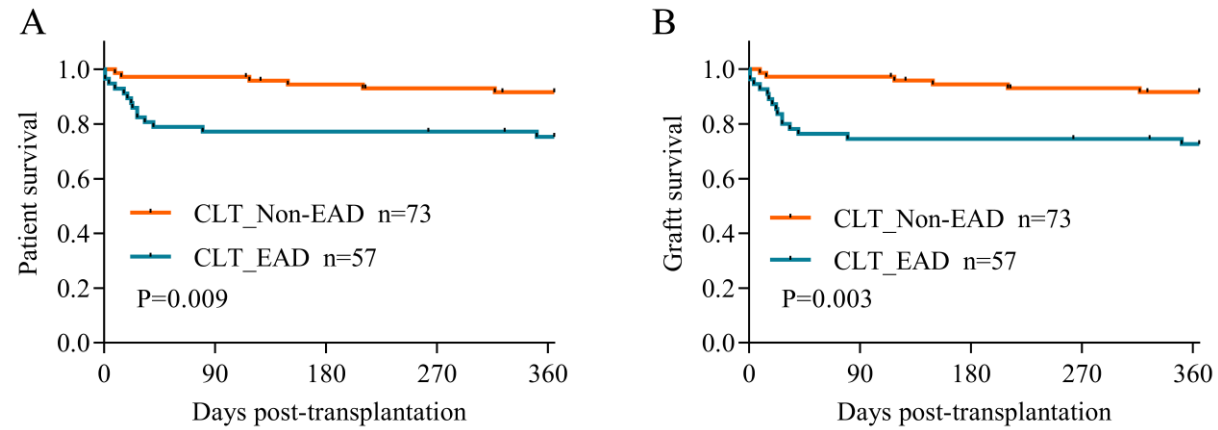

**Figure S7. Patient and graft survival in patients with and without early allograft dysfunction (EAD) in the conventional liver transplantation (CLT) group.** Kaplan-Meier methods were used to analyze patient (C) and graft (D) survival in the two subgroups. P values were calculated with the log-rank test.
